# Supplementary material for: Spectral and duration sensitivity to light-at-night in ‘blind’ and sighted rodent species
Source: Oxford University Press journal article supplement (doi:10.1242/jeb.058883), 2011-09-07
Supplement: jeb058883tables7.pdf [file jeb058883tables7.pdf]

Table S7. Population mean cosinor analysis of urinary metabolite of cortisol concentrations in *Microtus socialis* exposed to light-at-night with variant wavelengths and increasing duration of exposure

| Wavelength      | Duration | $\tau$ (h) | Amplitude<br>(pg ml <sup>-1</sup> g <sup>-1</sup> ) | Acrophase (h)                       | Mesor<br>(pg ml <sup>-1</sup> g <sup>-1</sup> ) | PR (%) | $F_{2,6}$ | $P$   |
|-----------------|----------|------------|-----------------------------------------------------|-------------------------------------|-------------------------------------------------|--------|-----------|-------|
| Blue (479 nm)   | Control  | 24         | 17.0<br>(13.1; 32.7)                                | 18:40 <sup>a</sup><br>(17:08–20:08) | 30.8 <sup>a</sup><br>(25.9–35.8)                | 51     | 9.41      | 0.04  |
|                 | 1 day    | 24         | 9.6<br>(2.56–16.6)                                  | 09:28 <sup>b</sup><br>(08:12–10:44) | 44.4 <sup>b</sup><br>(35.9–52.8)                | 42     | 18.56     | 0.01  |
|                 | 1 week   | 16         | 30.5<br>(16.9–45.8)                                 | 03:29<br>(02:38–04:20)              | 78.0<br>(59.9–96.2)                             | 65     | 26.88     | 0.002 |
|                 | 3 weeks  | 14         | 13.4                                                | 5:01                                | 89.8                                            | 38     | 4.48      | >0.05 |
| Yellow (586 nm) | Control  | 24         | 23.5<br>(5.06–42.0)                                 | 22:28<br>(20:40–00:12)              | 44.9<br>(28.9–60.8)                             | 43     | 11.52     | >0.03 |
|                 | 1 day    | 24         | 24.8<br>(15.5–34.0)                                 | 21:48<br>(19:00–00:36)              | 59.3<br>(46.9–71.7)                             | 50     | 9.69      | 0.04  |
|                 | 1 week   | 12         | 10                                                  | 09:08                               | 73                                              | 33     | 2.97      | >0.05 |
|                 | 3 weeks  | 12         | 10.3                                                | 09:38                               | 79.4                                            | 41     | 0.511     | >0.05 |
| Red (697 nm)    | Control  | 24         | 12.8                                                | 11:52                               | 47.2                                            | 40     | 2.88      | >0.05 |
|                 | 1 day    | 17         | 11.4                                                | 9:18                                | 49.4                                            | 24     | 1.87      | >0.05 |
|                 | 1 week   | 12         | 10.2                                                | 4:52                                | 60.1                                            | 56     | 1.37      | >0.05 |
|                 | 3 weeks  | 24         | 19.8                                                | 4:40                                | 59.2                                            | 43     | 5.28      | >0.05 |

PR, Percentage of the rhythm, represents the proportion of the total variance of the data accounted by the cosine estimation of a trial period;  $\tau$ , period repetition length of the cosine curve estimated by the spectral analysis.

Values in brackets for mesor, amplitude and acrophase are 95% confidence intervals (CI) of the group mean. CI values are not listed when  $P > 0.05$ .

$F$ - and  $P$ -values are presented for the amplitude=0 hypothesis. Different superscript letters indicate subgroups that are significantly different ( $P < 0.05$ ) at the same wavelength group.
