# Supplementary material for: Spectral and duration sensitivity to light-at-night in ‘blind’ and sighted rodent species
Source: Oxford University Press journal article supplement (doi:10.1242/jeb.058883), 2011-09-07
Supplement: jeb058883tables10.pdf [file jeb058883tables10.pdf]

Table S10. Population mean cosinor analysis of oxygen consumption rates in *Spalax ehrenbergi* acclimated to 3 weeks of light-at-night with three different wavelengths

| Wavelength      | Duration | $\tau$ (h) | Amplitude<br>(ml O <sub>2</sub><br>100 g <sup>-1</sup> h <sup>-1</sup> ) | Acrophase (h)                       | Mesor (ml O <sub>2</sub><br>100 g <sup>-1</sup> h <sup>-1</sup> ) | PR<br>(%) | $F_{2,6}$ | $P$    |
|-----------------|----------|------------|--------------------------------------------------------------------------|-------------------------------------|-------------------------------------------------------------------|-----------|-----------|--------|
| Blue (479 nm)   | Control  | 24         | 0.70 <sup>a</sup><br>(0.17–0.19)                                         | 02:36<br>(00:09–05:04)              | 1.61 <sup>a</sup><br>(1.25–1.97)                                  | 10        | 14.83     | 0.01   |
|                 |          | 12         | 0.13 (0.06–0.21)                                                         | 07:32<br>(04:38–10:26)              |                                                                   | 10        | 21.46     | 0.001  |
|                 | 3 weeks  | 24         | 0.35 <sup>b</sup><br>(0.28–0.68)                                         | 01:28<br>(00:16–02:40)              | 2.33 <sup>b</sup><br>(2.04–2.63)                                  | 28        | 11.74     | 0.01   |
| Yellow (586 nm) | Control  | 24         | 0.28 (0.19–0.37)                                                         | 09:00 <sup>a</sup><br>(07:36–10:24) | 1.24 <sup>a</sup><br>(1.07–1.42)                                  | 43        | 62.35     | 0.0001 |
|                 |          | 12         | 0.10 (0.03–0.17)                                                         | 03:26<br>(02:31–04:22)              |                                                                   | 10        | 7.94      | 0.04   |
|                 | 3 weeks  | 24         | 0.39 (0.32–0.43)                                                         | 02:56 <sup>b</sup><br>(00:25–05:27) | 1.57 <sup>b</sup><br>(1.43–1.72)                                  | 24        | 10.51     | 0.01   |
| Red (697 nm)    | Control  | 24         | 0.38 <sup>a</sup><br>(0.30–0.46)                                         | 00:00 <sup>a</sup><br>(22:40–01:16) | 1.54 <sup>a</sup><br>(1.49–1.60)                                  | 41        | 100.9     | 0.0001 |
|                 | 3 weeks  | 24         | 0.12 <sup>b</sup><br>(0.06–0.19)                                         | 04:58 <sup>b</sup><br>(03:18–06:39) | 0.73 <sup>b</sup><br>(0.68–0.78)                                  | 17        | 2.57      | >0.05  |

PR, Percentage of the rhythm, represents the proportion of the total variance of the data accounted by the cosine estimation of a trial period;  $\tau$ , period repetition length of the cosine curve estimated by the spectral analysis.

Values in brackets for mesor, amplitude and acrophase are 95% confidence intervals (CI) of the group mean. CI values are not listed when  $P > 0.05$ .

$F$ - and  $P$ -values are presented for the amplitude=0 hypothesis. Different superscript letters indicate subgroups that are significantly different ( $P < 0.05$ ) at the same wavelength group.
