# Supplementary figures and images for: Spectral and duration sensitivity to light-at-night in ‘blind’ and sighted rodent species
Source: Oxford University Press journal article supplement (doi:10.1242/jeb.058883), 2011-09-07

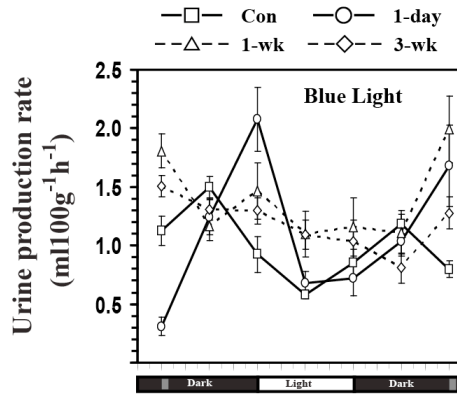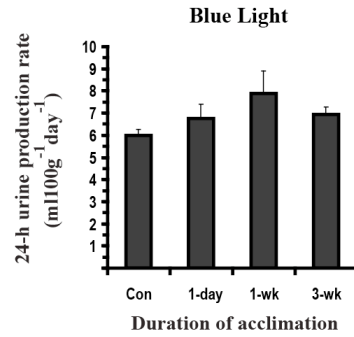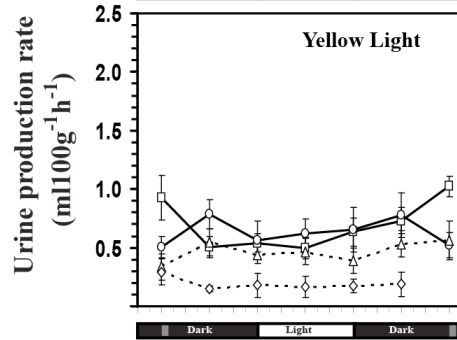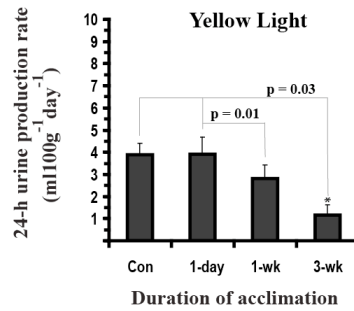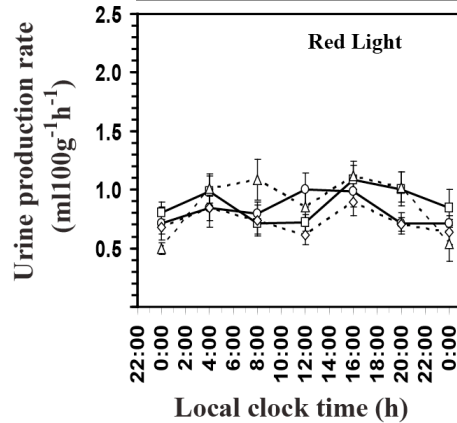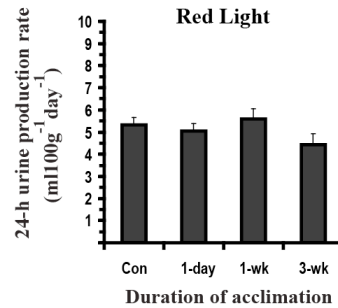

Supplement: jeb058883figs2.pdf [file jeb058883figs2.pdf]
